# Supplementary material
Source: publisher figshare collection journal article supplement (https://frontiersin.figshare.com/ndownloader/files/28007073)
Supplement: Supplementary file [file 28007073]

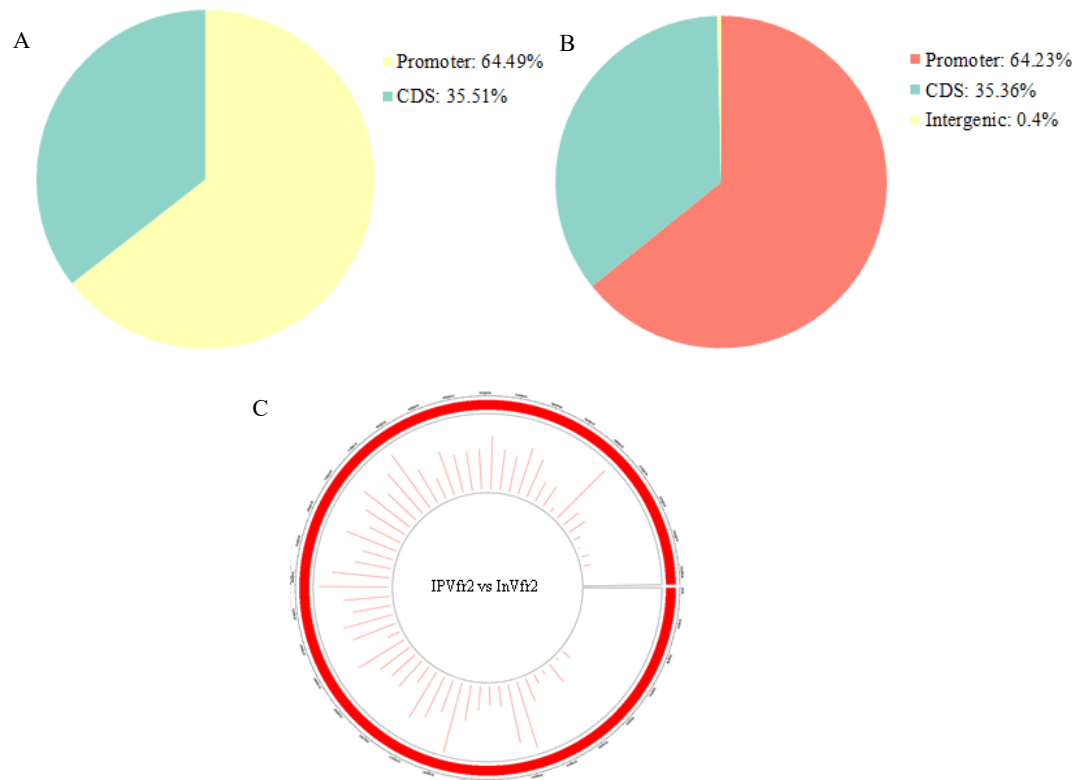

**Supplementary Figure 2.** Analysis of Vfr-bound genomic regions. (A) Distribution of Vfr binding regions throughout the genome. (B) Distribution of Vfr binding regions within genes. (C) Inner circular plot of the *P. protegens* FD6 genome indicating ChIP-seq coverage and the positions of Vfr-regulated genes. The length of the red lines indicates the degree of enrichment.
